# Supplementary material for: Phosphorylated 4EBP1 is associated with tumor progression and poor prognosis in Xp11.2 translocation renal cell carcinoma
Source: PubMed Central journal article supplement (PMC4812307; doi:10.1038/srep23594), 2016-03-30
Supplement: srep23594-s1.pdf [file srep23594-s1.pdf]

**Phosphorylated 4EBP1 is associated with tumor progression and poor prognosis  
in Xp11.2 translocation renal cell carcinoma**

**Running title: p-4EBP1 is associated with tumor progression and poor prognosis  
in Xp11.2 RCC**

Yuanyuan Qu<sup>¶1,4</sup>, Rui Zhao<sup>¶2</sup>, Hongkai Wang<sup>1,4</sup>, Kun Chang<sup>1,4</sup>, Xiaoqun Yang<sup>3,4</sup>,  
Xiaoyan Zhou<sup>3,4</sup>, Bo Dai<sup>1,4</sup>, Yao Zhu<sup>1,4</sup>, Guohai Shi<sup>1,4</sup>, Hailiang Zhang<sup>\*1,4</sup>, Dingwei  
Ye<sup>\*1,4</sup>

<sup>¶</sup>Co-first authors

## Supplementary Figures

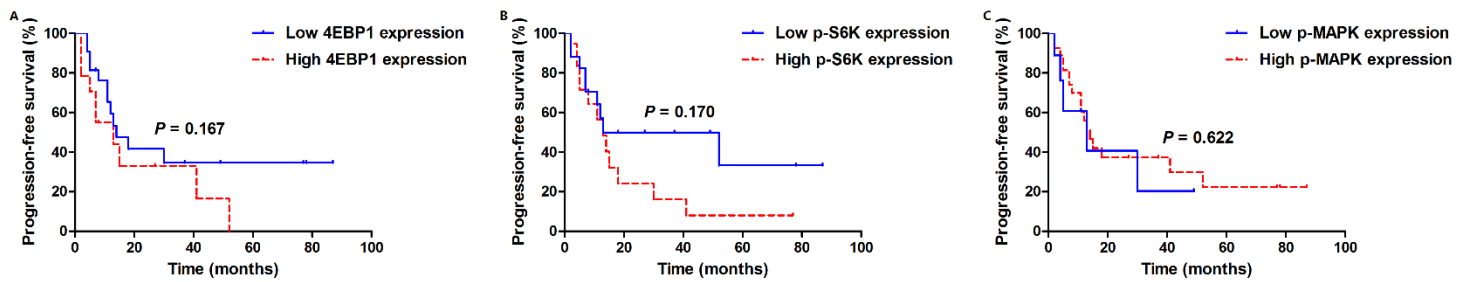

**Supplemental Figure 1.** Kaplan–Meier analysis of PFS curves in adult Xp11.2 RCC patients. (A) Stratified according to 4EBP1 expression (log-rank  $P = 0.167$ ); (B) Stratified according to p-S6K expression (log-rank  $P = 0.170$ ); (C) Stratified according to p-MAPK expression (log-rank  $P = 0.622$ ). PFS, progression-free survival; Xp11.2 RCC, Xp11.2 translocation renal cell carcinoma; 4EBP1, eukaryotic initiation factor 4E (eIF4E) binding protein 1; p-S6K, phosphorylated ribosomal protein S6 kinase; p-MAPK, phosphorylated mitogen-activated protein kinase.

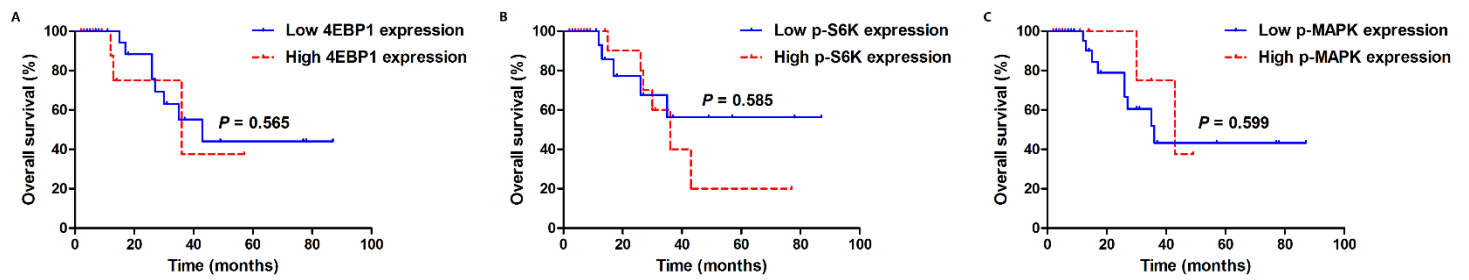

**Supplemental Figure 2.** Kaplan–Meier analysis of OS curves in adult Xp11.2 RCC patients. (A) Stratified according to 4EBP1 expression (log-rank  $P = 0.565$ ); (B) Stratified according to p-S6K expression (log-rank  $P = 0.585$ ); (C) Stratified according to p-MAPK expression (log-rank  $P = 0.599$ ). OS, overall survival; Xp11.2 RCC, Xp11.2 translocation renal cell carcinoma; 4EBP1, eukaryotic initiation factor 4E (eIF4E) binding protein 1; p-S6K, phosphorylated ribosomal protein S6 kinase; p-MAPK, phosphorylated mitogen-activated protein kinase.

## Supplementary Tables

**Supplementary Table 1.** Clinicopathological characteristics in relation to 4EBP1/p-mTOR expression status

| Variable                         | 4EBP1 expression         |                           | <i>P</i> value | p-mTOR expression        |                           | <i>P</i> value |
|----------------------------------|--------------------------|---------------------------|----------------|--------------------------|---------------------------|----------------|
|                                  | Low expression<br>(n=22) | High expression<br>(n=14) |                | Low expression<br>(n=20) | High expression<br>(n=16) |                |
| Median age at surgery (y, range) | 27.0 (14.0-63.0)         | 30.0 (14.0-40.0)          | 0.476          | 30.0 (14.0-63.0)         | 27.0 (14.0-47.0)          | 0.344          |
| Sex (n, %)                       |                          |                           | 0.143          |                          |                           | 0.877          |
| Male                             | 10 (45.5)                | 3 (21.4)                  |                | 7 (35.0)                 | 6 (37.5)                  |                |
| Female                           | 12 (54.5)                | 11 (78.6)                 |                | 13 (65.0)                | 10 (62.5)                 |                |
| Clinical manifestation (n, %)    |                          |                           | 0.204          |                          |                           | 0.221          |
| Incidental                       | 11 (50.0)                | 4 (28.6)                  |                | 8 (40.0)                 | 8 (50.0)                  |                |
| Symptomatic                      | 11 (50.0)                | 10 (71.4)                 |                | 12 (60.0)                | 8 (50.0)                  |                |
| Laterality (n, %)                |                          |                           | 0.494          |                          |                           | 1.000          |
| Left                             | 10 (45.5)                | 8 (57.1)                  |                | 10 (50.0)                | 8 (50.0)                  |                |
| Right                            | 12 (54.5)                | 6 (42.9)                  |                | 10 (50.0)                | 8 (50.0)                  |                |
| Operation (n, %)                 |                          |                           | 0.760          |                          |                           | 0.230          |
| Radical nephrectomy              | 18 (81.8)                | 12 (85.7)                 |                | 18 (90.0)                | 12 (75.0)                 |                |
| Partial nephrectomy              | 4 (18.2)                 | 2 (14.3)                  |                | 2 (10.0)                 | 4 (25.0)                  |                |
| Median tumor size (cm, range)    | 5.1 (2.3-18.0)           | 6.7 (2.0-15.0)            | 0.234          | 6.4 (2.0-18.0)           | 5.5 (2.6-11.2)            | 0.433          |
| T stage at presentation (n, %)   |                          |                           | 0.809          |                          |                           | 0.343          |
| T1-T2                            | 15 (68.2)                | 9 (64.3)                  |                | 12 (60.0)                | 12 (75.0)                 |                |
| T3-T4                            | 7 (31.8)                 | 5 (35.7)                  |                | 8 (40.0)                 | 4 (25.0)                  |                |
| N stage at presentation (n, %)   |                          |                           | 0.697          |                          |                           | 0.878          |
| N0                               | 14 (63.6)                | 8 (57.1)                  |                | 12 (60.0)                | 10 (62.5)                 |                |
| N1                               | 8 (36.4)                 | 6 (42.9)                  |                | 8 (40.0)                 | 6 (37.5)                  |                |

|                                |           |           |       |           |           |
|--------------------------------|-----------|-----------|-------|-----------|-----------|
| M stage at presentation (n, %) |           |           | 0.465 |           | 0.720     |
| M0                             | 18 (81.8) | 10 (71.4) |       | 16 (80.0) | 12 (75.0) |
| M1                             | 4 (18.2)  | 4 (28.6)  |       | 4 (20.0)  | 4 (25.0)  |
| ISUP grade (n, %)              |           |           | 0.361 |           | 0.720     |
| 1-2                            | 6 (27.3)  | 2 (14.3)  |       | 4 (20.0)  | 4 (25.0)  |
| 3-4                            | 16 (72.7) | 12 (85.7) |       | 16 (80.0) | 12 (75.0) |
| Adjuvant therapy (n, %)        |           |           | 0.359 |           | 0.382     |
| None                           | 9 (40.9)  | 4 (28.6)  |       | 9 (45.0)  | 4 (25.0)  |
| Immunotherapy                  | 4 (18.2)  | 1 (7.1)   |       | 3 (15.0)  | 2 (12.5)  |
| Targeted therapy               | 9 (40.9)  | 9 (64.3)  |       | 8 (40.0)  | 10 (62.5) |

---

**Continued Supplementary Table 1.** Clinicopathological characteristics in relation to p-S6K/p-MAPK expression status

| Variable                         | p-S6K expression         |                           | P value | p-MAPK expression        |                          | P value |
|----------------------------------|--------------------------|---------------------------|---------|--------------------------|--------------------------|---------|
|                                  | Low expression<br>(n=17) | High expression<br>(n=19) |         | Low expression<br>(n=27) | High expression<br>(n=9) |         |
| Median age at surgery (y, range) | 28.0 (14.0-63.0)         | 31.0 (14.0-48.0)          | 0.978   | 30.9 (14.0-63.0)         | 25.2 (14.0-48.0)         | 0.227   |
| Sex (n, %)                       |                          |                           | 0.429   |                          |                          | 0.161   |
| Male                             | 5 (29.4)                 | 8 (42.1)                  |         | 8 (29.6)                 | 5 (55.6)                 |         |
| Female                           | 12 (70.6)                | 11 (57.9)                 |         | 19 (71.4)                | 4 (44.4)                 |         |
| Clinical manifestation (n, %)    |                          |                           | 0.463   |                          |                          | 0.079   |
| Incidental                       | 6 (35.3)                 | 9 (47.4)                  |         | 9 (33.3)                 | 6 (66.7)                 |         |
| Symptomatic                      | 11 (64.7)                | 10 (52.6)                 |         | 18 (66.7)                | 3 (33.3)                 |         |
| Laterality (n, %)                |                          |                           | 0.095   |                          |                          | 0.054   |
| Left                             | 11 (64.7)                | 7 (36.8)                  |         | 16 (59.3)                | 2 (22.2)                 |         |
| Right                            | 6 (35.3)                 | 12 (63.2)                 |         | 11 (40.7)                | 7 (77.8)                 |         |
| Operation (n, %)                 |                          |                           | 0.455   |                          |                          | 0.606   |
| Radical nephrectomy              | 15 (88.2)                | 15 (78.9)                 |         | 23 (85.2)                | 7 (77.8)                 |         |
| Partial nephrectomy              | 2 (11.8)                 | 4 (21.1)                  |         | 4 (14.8)                 | 2 (22.2)                 |         |
| Median tumor size (cm, range)    | 6.4 (2.0-18.0)           | 5.5 (2.6-10.5)            | 0.218   | 7.0 (2.6-18.0)           | 5.3 (2.6-10.5)           | 0.235   |
| T stage at presentation (n, %)   |                          |                           | 0.345   |                          |                          | 1.000   |
| T1-T2                            | 10 (58.8)                | 14 (73.7)                 |         | 18 (66.7)                | 6 (66.7)                 |         |
| T3-T4                            | 7 (41.2)                 | 5 (26.3)                  |         | 9 (33.3)                 | 3 (33.3)                 |         |
| N stage at presentation (n, %)   |                          |                           | 0.790   |                          |                          | 0.693   |
| N0                               | 10 (58.8)                | 12 (63.2)                 |         | 17 (63.0)                | 5 (55.6)                 |         |
| N1                               | 7 (41.2)                 | 7 (36.8)                  |         | 10 (37.0)                | 4 (44.4)                 |         |
| M stage at presentation (n, %)   |                          |                           | 0.858   |                          |                          | 1.000   |
| M0                               | 13 (76.5)                | 15 (78.9)                 |         | 21 (77.8)                | 7 (77.8)                 |         |

|                         |           |           |       |           |          |       |
|-------------------------|-----------|-----------|-------|-----------|----------|-------|
| M1                      | 4 (23.5)  | 4 (21.1)  |       | 6 (22.2)  | 2 (22.2) |       |
| ISUP grade (n, %)       |           |           | 0.532 |           |          | 0.355 |
| 1-2                     | 3 (17.6)  | 5 (26.3)  |       | 5 (18.5)  | 3 (33.3) |       |
| 3-4                     | 14 (82.4) | 14 (73.7) |       | 22 (81.5) | 6 (66.7) |       |
| Adjuvant therapy (n, %) |           |           | 0.920 |           |          | 0.138 |
| None                    | 6 (35.3)  | 7 (36.8)  |       | 10 (37.0) | 3 (33.3) |       |
| Immunotherapy           | 2 (11.8)  | 3 (15.8)  |       | 2 (7.4)   | 3 (33.3) |       |
| Targeted therapy        | 9 (52.9)  | 9 (47.4)  |       | 15 (55.6) | 3 (33.3) |       |

4EBP1, eukaryotic initiation factor 4E (eIF4E) binding protein 1; p-mTOR, phosphorylated mammalian target of rapamycin; ISUP, International Society of Urological Pathology; p-S6K, phosphorylated ribosomal protein S6 kinase; p-MAPK, phosphorylated mitogen-activated protein kinase.
